# Supplementary material for: Mycobacterium chimaera Infections in a Unit of Cardio Surgery: Study at a General Hospital in Padua, Italy
Source: MDPI journal article supplement (doi:10.3390/microorganisms12010029), 2023-12-23
Supplement: s1 [file s1]

# Supplementary materials

**Table S1.** Distribution of the positivities by month in the pre disinfection samples.

| Pre  | Months   | Type 1  |   |         | Type 2       |   |         | Total   |   |         |
|------|----------|---------|---|---------|--------------|---|---------|---------|---|---------|
|      |          | Samples |   |         | Positivities |   |         | Samples |   |         |
|      |          | N       | N | (%)     | N            | N | (%)     | N       | N | (%)     |
| 2017 | Jan-Apr  |         |   |         |              |   |         |         |   |         |
|      | May-Aug  |         |   |         |              |   |         |         |   |         |
|      | Sept-Dec |         |   |         |              |   |         |         |   |         |
| 2018 | Jan-Apr  |         |   |         |              |   |         |         |   |         |
|      | May-Aug  |         |   |         |              |   |         |         |   |         |
|      | Sept-Dec |         |   |         |              |   |         |         |   |         |
| 2019 | Jan      |         |   |         |              |   |         |         |   |         |
|      | Feb      |         |   |         |              |   |         |         |   |         |
|      | Mar      |         |   |         |              |   |         |         |   |         |
|      | Apr      |         |   |         |              |   |         |         |   |         |
|      | May      |         |   |         |              |   |         |         |   |         |
|      | June     |         |   |         |              |   |         |         |   |         |
|      | July     | 3       | 2 | (66,7)  | 2            | 1 | (50,0)  | 5       | 3 | (60,0)  |
|      | Aug      |         |   |         | 2            | 2 | (100,0) | 2       | 2 | (100,0) |
|      | Sept     | 2       | 2 | (100,0) |              |   |         | 2       | 2 | (100,0) |
|      | Oct      |         |   |         |              |   |         |         |   |         |
|      | Nov      |         |   |         | 2            | 0 | (0,0)   | 2       | 0 | (0,0)   |
|      | Dec      |         |   |         | 1            | 0 | (0,0)   | 1       | 0 | (0,0)   |
| 2020 | Jan      | 5       | 1 | (20,0)  | 3            | 0 | (0,0)   | 8       | 1 | (12,5)  |
|      | Feb      | 5       | 1 | (20,0)  | 16           | 2 | (12,5)  | 21      | 3 | (14,3)  |
|      | Mar      | 9       | 2 | (22,2)  | 9            | 1 | (11,1)  | 18      | 3 | (16,7)  |

|       |      |     |    |        |     |   |       |     |        |        |
|-------|------|-----|----|--------|-----|---|-------|-----|--------|--------|
|       | Apr  |     |    |        |     |   |       |     |        |        |
|       | May  |     |    |        |     |   |       |     |        |        |
|       | June | 5   | 1  | (20,0) |     |   | 5     | 1   | (20,0) |        |
|       | July | 10  | 3  | (30,0) | 40  | 1 | (2,5) | 50  | 4      | (8,0)  |
|       | Aug  | 12  | 4  | (33,3) | 22  | 0 | (0,0) | 34  | 4      | (11,8) |
|       | Sept | 10  | 6  | (60,0) | 30  | 1 | (3,3) | 40  | 7      | (17,5) |
|       | Oct  | 10  | 4  | (40,0) | 38  | 0 | (0,0) | 48  | 4      | (8,3)  |
|       | Nov  | 8   | 3  | (37,5) | 26  | 0 | (0,0) | 34  | 3      | (8,8)  |
|       | Dec  | 9   | 1  | (11,1) | 22  | 0 | (0,0) | 31  | 1      | (3,2)  |
| 2021  | Jan  | 5   | 2  | (40,0) | 15  | 0 | (0,0) | 20  | 2      | (10,0) |
|       | Feb  | 4   | 1  | (25,0) | 11  | 0 | (0,0) | 15  | 1      | (6,7)  |
|       | Mar  | 4   | 1  | (25,0) | 13  | 1 | (7,7) | 17  | 2      | (11,8) |
|       | Apr  | 5   | 2  | (40,0) | 11  | 0 | (0,0) | 16  | 2      | (12,5) |
|       | May  | 5   | 1  | (20,0) | 15  | 0 | (0,0) | 20  | 1      | (5,0)  |
|       | June | 4   | 2  | (50,0) | 11  | 0 | (0,0) | 15  | 2      | (13,3) |
|       | July | 4   | 1  | (25,0) | 10  | 0 | (0,0) | 14  | 1      | (7,1)  |
|       | Aug  | 4   | 1  | (25,0) | 5   | 0 | (0,0) | 9   | 1      | (11,1) |
|       | Sept | 3   | 1  | (33,3) | 1   | 0 | (0,0) | 4   | 1      | (25,0) |
|       | Oct  | 3   | 1  | (33,3) | 1   | 0 | (0,0) | 4   | 1      | (25,0) |
|       | Nov  | 4   | 1  | (25,0) | 5   | 0 | (0,0) | 9   | 1      | (11,1) |
|       | Dec  | 4   | 0  | (0,0)  | 18  | 0 | (0,0) | 22  | 0      | (0,0)  |
| 2022  | Jan  | 4   | 3  | (75,0) | 4   | 0 | (0,0) | 8   | 3      | (37,5) |
|       | Feb  | 4   | 2  | (50,0) | 2   | 0 | (0,0) | 6   | 2      | (33,3) |
|       | Mar  | 4   | 3  | (75,0) | 2   | 0 | (0,0) | 6   | 3      | (50,0) |
|       | Apr  | 5   | 2  | (40,0) | 2   | 0 | (0,0) | 7   | 2      | (28,6) |
|       | May  | 3   | 0  | (0,0)  | 8   | 0 | (0,0) | 11  | 0      | (0,0)  |
| Total |      | 157 | 54 | (34,4) | 347 | 9 | (2,6) | 504 | 63     | (12,5) |

**Table S2.** Distribution of positivities by month in the post-disinfection samples.

| Post | Month    | Type 1  |   |              | Type 2  |    |              | Total   |    |              |
|------|----------|---------|---|--------------|---------|----|--------------|---------|----|--------------|
|      |          | Samples |   | Positivities | Samples |    | Positivities | Samples |    | Positivities |
|      |          | N       | N | (%)          | N       | N  | (%)          | N       | N  | (%)          |
| 2017 | Jan-Apr  | 6       | 0 | (0,0)        | 4       | 0  | (0,0)        | 10      | 0  | (0,0)        |
|      | May-Aug  |         |   |              |         |    |              |         |    |              |
|      | Sept-Dec | 7       | 0 | (0,0)        |         |    |              | 7       | 0  | (0,0)        |
| 2018 | Jan-Apr  |         |   |              | 7       | 0  | (0,0)        | 7       | 0  | (0,0)        |
|      | May-Aug  | 5       | 0 | (0,0)        |         |    |              | 5       | 0  | (0,0)        |
|      | Sept-Dec | 5       | 0 | (0,0)        |         |    |              | 5       | 0  | (0,0)        |
| 2019 | Jan      |         |   |              |         |    |              |         |    |              |
|      | Feb      |         |   |              | 3       | 2  | (66,7)       | 3       | 2  | (66,7)       |
|      | Mar      | 6       | 2 | (33,3)       | 9       | 2  | (22,2)       | 15      | 4  | (26,7)       |
|      | Apr      | 3       | 0 | (0,0)        |         |    |              | 3       | 0  | (0,0)        |
|      | May      |         |   |              |         |    |              |         |    |              |
|      | June     | 5       | 2 | (40,0)       | 12      | 12 | (100,0)      | 17      | 14 | (82,4)       |
|      | July     | 5       | 1 | (20,0)       | 16      | 7  | (43,8)       | 21      | 8  | (38,1)       |
|      | Aug      | 1       | 0 | (0,0)        | 2       | 1  | (50,0)       | 3       | 1  | (33,3)       |
|      | Sept     | 4       | 1 | (25,0)       |         |    |              | 4       | 1  | (25,0)       |
|      | Oct      |         |   |              |         |    |              |         |    |              |
|      | Nov      |         |   |              | 12      | 0  | (0,0)        | 12      | 0  | (0,0)        |
|      | Dec      | 4       | 3 | (75,0)       | 2       | 0  | (0,0)        | 6       | 3  | (50,0)       |
| 2020 | Jan      | 11      | 1 | (9,1)        | 3       | 0  | (0,0)        | 14      | 1  | (7,1)        |
|      | Feb      | 7       | 0 | (0,0)        | 16      | 2  | (12,5)       | 23      | 2  | (8,7)        |
|      | Mar      | 9       | 0 | (0,0)        | 10      | 0  | (0,0)        | 19      | 0  | (0,0)        |
|      | Apr      |         |   |              |         |    |              |         |    |              |
|      | May      |         |   |              |         |    |              |         |    |              |
|      | June     | 5       | 0 | (0,0)        |         |    |              | 5       | 0  | (0,0)        |
|      | July     | 10      | 1 | (10,0)       | 40      | 0  | (0,0)        | 50      | 1  | (2,0)        |

|       |      |     |    |        |     |    |       |     |    |        |
|-------|------|-----|----|--------|-----|----|-------|-----|----|--------|
|       | Aug  | 12  | 2  | (16,7) | 22  | 0  | (0,0) | 34  | 2  | (5,9)  |
|       | Sept | 11  | 1  | (9,1)  | 30  | 0  | (0,0) | 41  | 1  | (2,4)  |
|       | Oct  | 12  | 2  | (16,7) | 38  | 0  | (0,0) | 50  | 2  | (4,0)  |
|       | Nov  | 14  | 3  | (21,4) | 26  | 0  | (0,0) | 40  | 3  | (7,5)  |
|       | Dec  | 9   | 1  | (11,1) | 22  | 0  | (0,0) | 31  | 1  | (3,2)  |
| 2021  | Jan  | 5   | 0  | (0,0)  | 17  | 0  | (0,0) | 22  | 0  | (0,0)  |
|       | Feb  | 5   | 0  | (0,0)  | 11  | 0  | (0,0) | 16  | 0  | (0,0)  |
|       | Mar  | 5   | 0  | (0,0)  | 13  | 0  | (0,0) | 18  | 0  | (0,0)  |
|       | Apr  | 6   | 3  | (50,0) | 11  | 0  | (0,0) | 17  | 3  | (17,6) |
|       | May  | 6   | 1  | (16,7) | 15  | 0  | (0,0) | 21  | 1  | (4,8)  |
|       | June | 5   | 1  | (20,0) | 11  | 0  | (0,0) | 16  | 1  | (6,3)  |
|       | July | 4   | 1  | (25,0) | 14  | 0  | (0,0) | 18  | 1  | (5,6)  |
|       | Aug  | 4   | 0  | (0,0)  | 5   | 0  | (0,0) | 9   | 0  | (0,0)  |
|       | Sept | 2   | 1  | (50,0) | 1   | 0  | (0,0) | 3   | 1  | (33,3) |
|       | Oct  | 4   | 1  | (25,0) | 1   | 0  | (0,0) | 5   | 1  | (20,0) |
|       | Nov  | 4   | 0  | (0,0)  | 5   | 0  | (0,0) | 9   | 0  | (0,0)  |
|       | Dec  | 4   | 0  | (0,0)  | 18  | 0  | (0,0) | 22  | 0  | (0,0)  |
| 2022  | Jan  | 4   | 0  | (0,0)  | 4   | 0  | (0,0) | 8   | 0  | (0,0)  |
|       | Feb  | 4   | 0  | (0,0)  | 2   | 0  | (0,0) | 6   | 0  | (0,0)  |
|       | Mar  | 5   | 1  | (20,0) | 2   | 0  | (0,0) | 7   | 1  | (14,3) |
|       | Apr  | 5   | 0  | (0,0)  | 2   | 0  | (0,0) | 7   | 0  | (0,0)  |
|       | May  | 4   | 0  | (0,0)  | 8   | 0  | (0,0) | 12  | 0  | (0,0)  |
| Total |      | 227 | 29 | (12,8) | 414 | 26 | (6,3) | 641 | 55 | (8,6)  |
